# Supplementary material for: Green direct ultrasonic slurry sampling and electrothermal atomic absorption spectrometry method for metal analysis of solid plastics samples
Source: Royal Society of Chemistry journal article supplement (doi:10.1039/d3ay02116e), 2024-01-01
Supplement: d3ay02116e4.pdf [file d3ay02116e4.pdf]

Supplementary figure captions:

**Fig. S1.** Pyrolysis (A) and atomisation (B) temperature curve profiles for 50  $\mu\text{g L}^{-1}$  aqueous Al standard solution and solid plastic sample suspensions with addition of 50  $\mu\text{g L}^{-1}$  Al standard solution without matrix modifier. Error bars indicate sample standard deviations ( $n = 6$ ).

**Fig. S2.** Pyrolysis (A) and atomisation (B) temperature curve profiles for 50  $\mu\text{g L}^{-1}$  aqueous Ba standard solution and solid plastic sample suspensions with addition of 50  $\mu\text{g L}^{-1}$  Ba standard solution without matrix modifier. Error bars indicate sample standard deviations ( $n = 6$ ).

**Fig. S3.** Pyrolysis (A) and atomisation (B) temperature curve profiles for 50  $\mu\text{g L}^{-1}$  aqueous Cr standard solution and solid plastic sample suspensions with addition of 50  $\mu\text{g L}^{-1}$  Cr standard solution without matrix modifier. Error bars indicate sample standard deviations ( $n = 6$ ).
